# Supplementary material
Source: MDPI journal article supplement (https://www.mdpi.com/2073-4352/13/1/147)
Supplement: s1 [file s1]

## Supplementary Materials: Simplified Approach to Characterize the Cooling Crystallization in a Modular Mini-Plant

Stefan Höving , Phil Bolien, Paul Siebers and Norbert Kockmann \* 

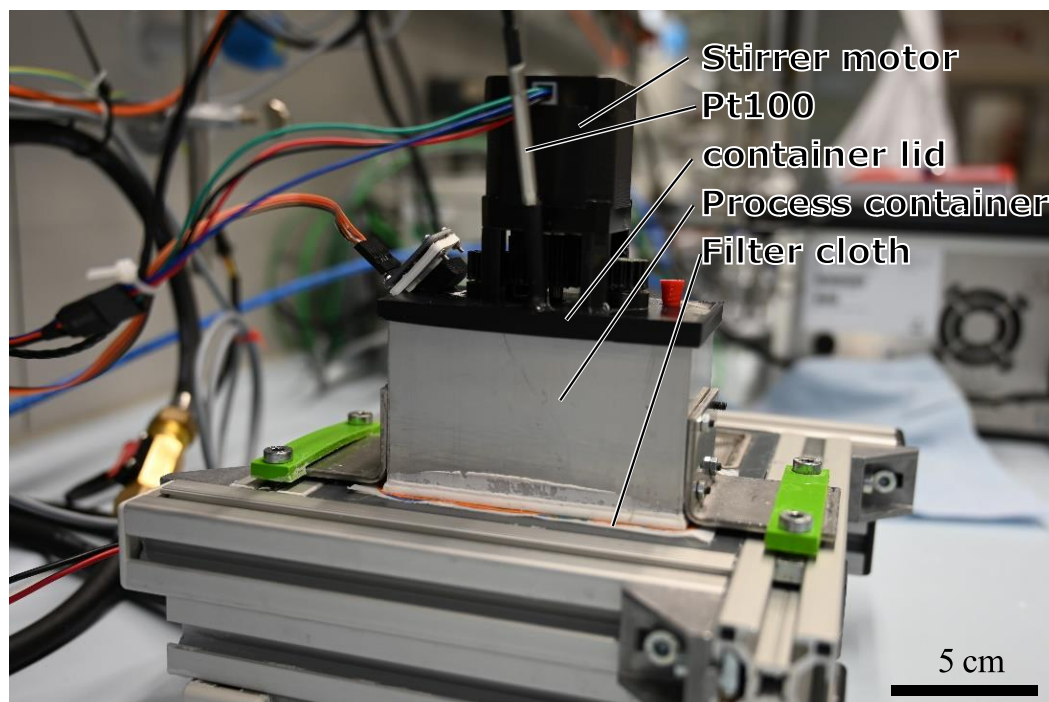

Figure S1. Image of the simplified benchtop setup.

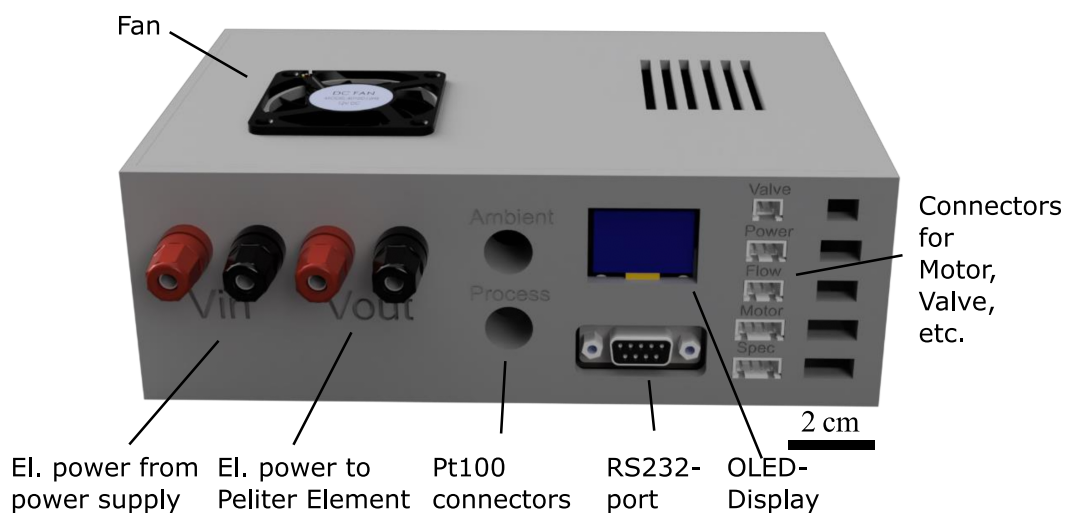

Figure S2. Rendering of the controller box for the benchtop setup.

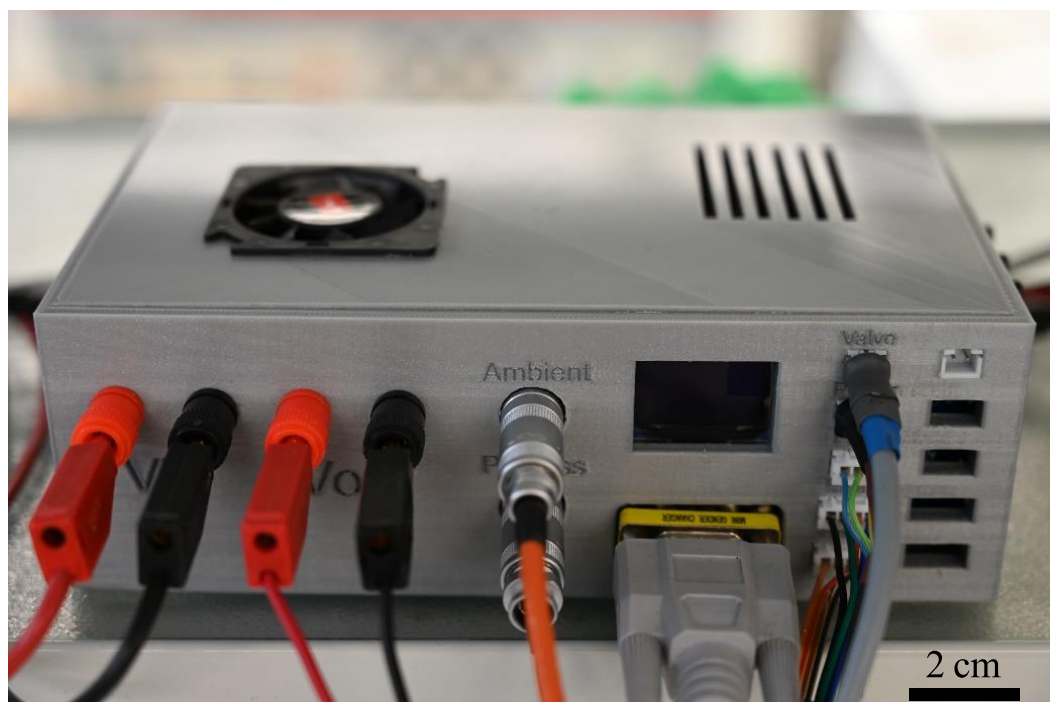

**Figure S3.** Image of the control box for the benchtop setup. The box was 3D printed from PLA.

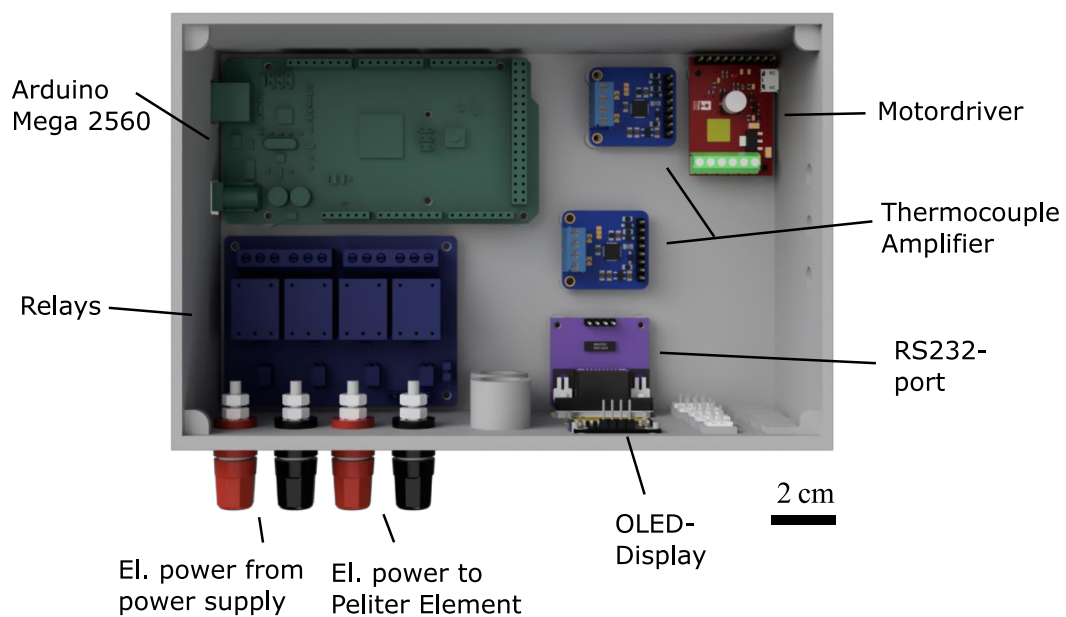

**Figure S4.** Rendering of the controller box for the benchtop setup with the lid removed. Electric components are visible.

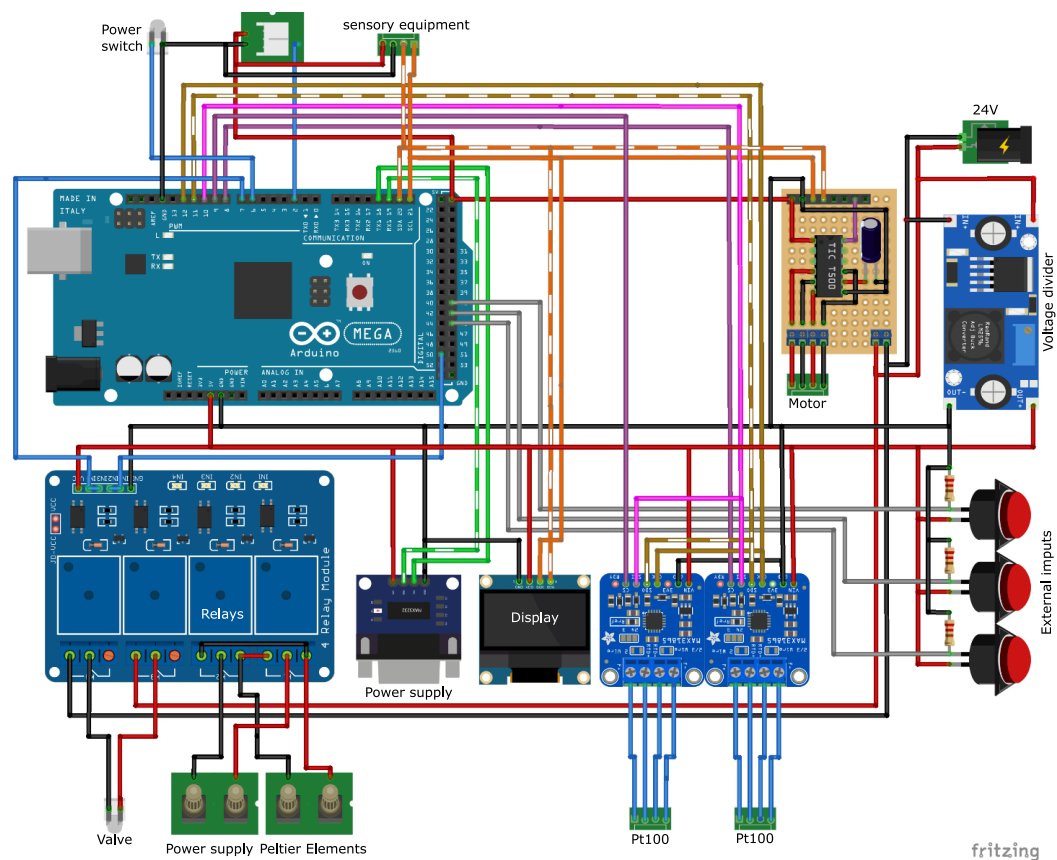

Figure S5. Wiring diagram for the controller box.

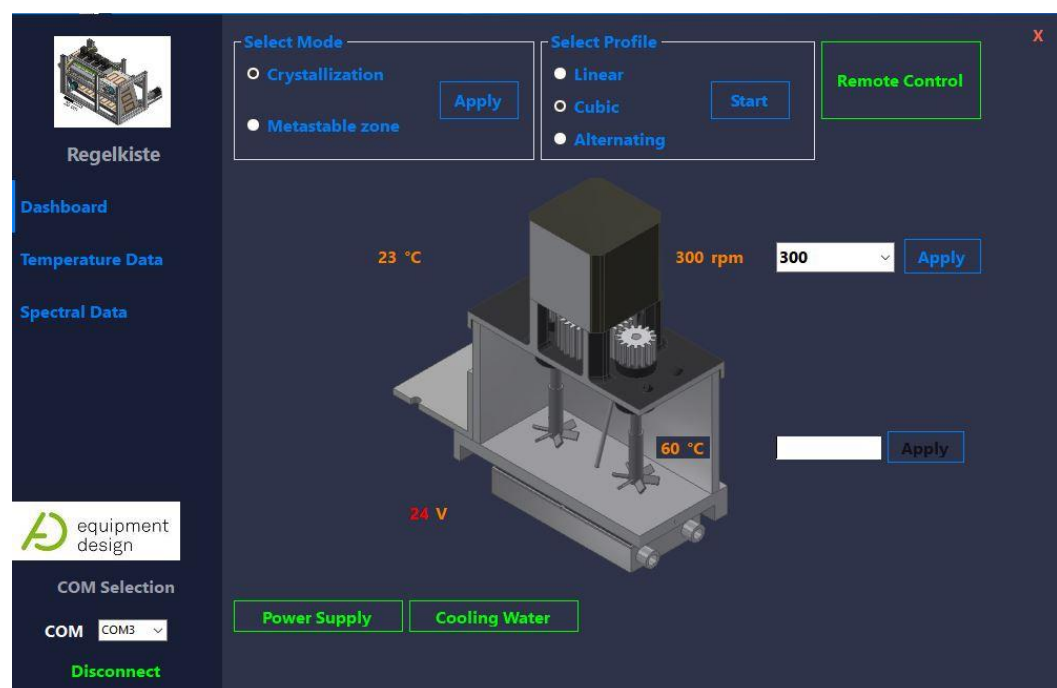

Figure S6. Screenshot of the graphical user interface to preset and record settings and parameter from the controller box.

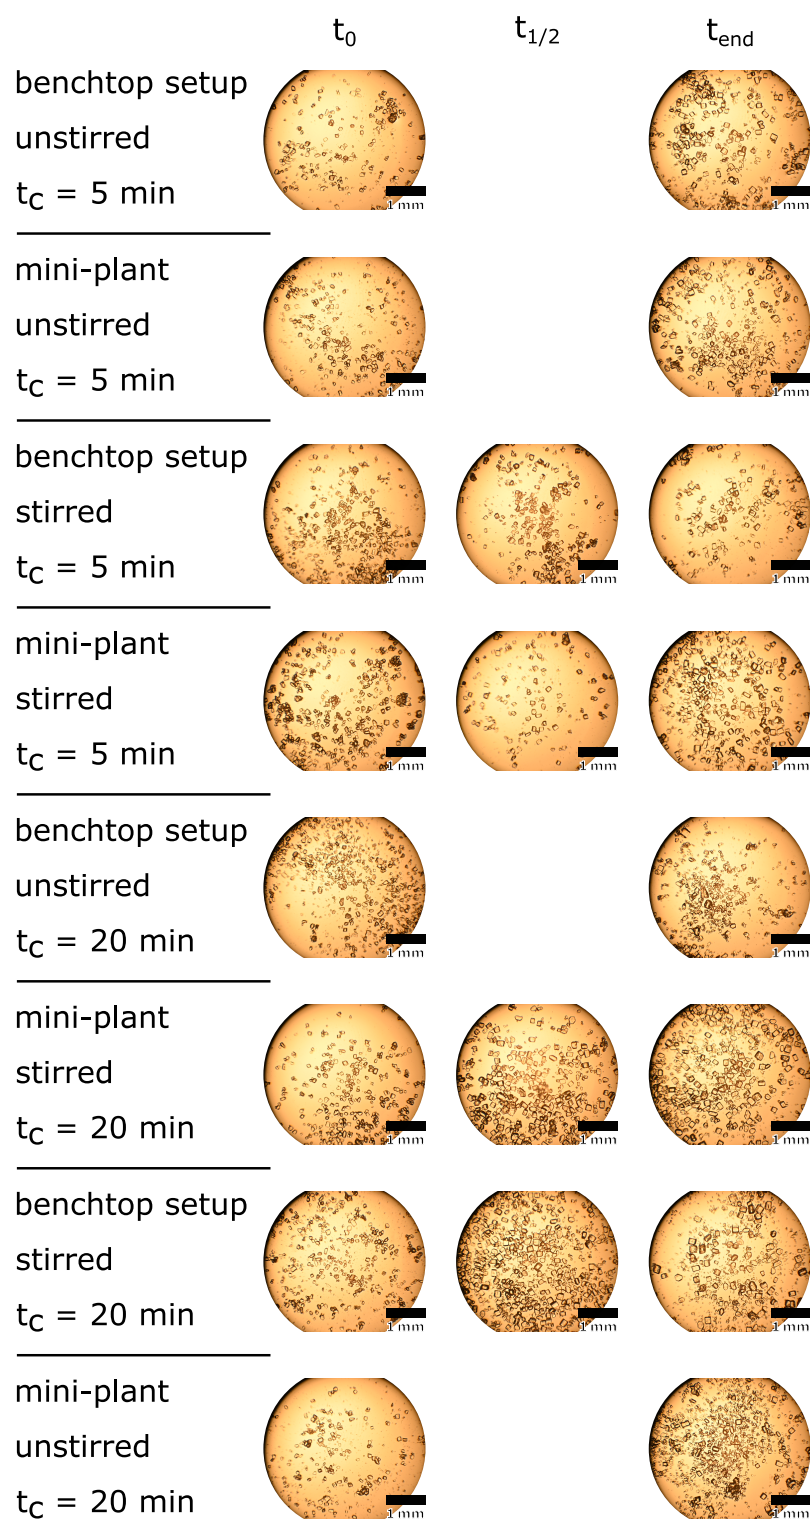**Figure S7.** Images of crystals from the different experiments.
